# Supplementary material
Source: PubMed Central journal article supplement (PMC2104486)

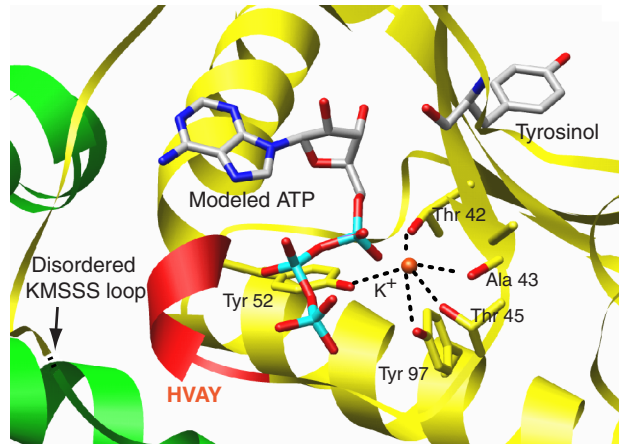

Supplement: NIHMS27541-supplement-01.pdf [file NIHMS27541-supplement-01.pdf]
